# Supplementary material
Source: PubMed Central journal article supplement (PMC8353576)
Supplement: jamapediatr-e212482-s001.pdf [file jamapediatr-e212482-s001.pdf]

## Supplemental Online Content

Racine N, McArthur BA, Cooke JE, Eirich R, Zhu J, Madigan S. Global prevalence of depressive and anxiety symptoms in children and adolescents during COVID-19: a meta-analysis. *JAMA Pediatr*. Published online August 9, 2021. doi:10.1001/jamapediatrics.2021.2482

**eTable 1.** Example Search Strategy from Medline

**eTable 2.** Study Quality Evaluation Criteria

**eTable 3.** Quality Assessment of Studies Included

**eTable 4.** Sensitivity analysis excluding low quality studies (score=2) for moderators of the prevalence of clinically elevated depressive symptoms in children and adolescence during COVID-19

**eTable 5.** Sensitivity analysis excluding low quality studies (score=2) for moderators of the prevalence of clinically elevated anxiety symptoms in children and adolescence during COVID-19

**eFigure 1.** PRISMA diagram of review search strategy

**eFigure 2.** Funnel plot for studies included in the clinically elevated depressive symptoms

**eFigure 3.** Funnel plot for studies included in the clinically elevated anxiety symptoms

This supplemental material has been provided by the authors to give readers additional information about their work.

**eTable 1.** Example Search Strategy from Medline.

**Ovid MEDLINE(R) and Epub Ahead of Print, In-Process & Other Non-Indexed Citations and Daily <1946 to February 15, 2021>**

| #  | Searches                                                                                                                                                                                                                                                                                                                                                                                                                                                                                                                                                                                                                                         |  |
|----|--------------------------------------------------------------------------------------------------------------------------------------------------------------------------------------------------------------------------------------------------------------------------------------------------------------------------------------------------------------------------------------------------------------------------------------------------------------------------------------------------------------------------------------------------------------------------------------------------------------------------------------------------|--|
| 1  | Mental Health/                                                                                                                                                                                                                                                                                                                                                                                                                                                                                                                                                                                                                                   |  |
| 2  | mental disorders/ or exp anxiety disorders/ or exp mood disorders/ or neurotic disorders/ or exp "trauma and stressor related disorders"/                                                                                                                                                                                                                                                                                                                                                                                                                                                                                                        |  |
| 3  | child reactive disorders/ or depression/ or obsessive behavior/ or stress, psychological/ or burnout, psychological/ or anxiety/ or catastrophization/ or psychological distress/ or exp Self-Injurious Behavior/                                                                                                                                                                                                                                                                                                                                                                                                                                |  |
| 4  | ((mental* or psychiatric or psychologic* or behavior* or behaviour* or mood* or panic* or affective or emotion* or neurotic or psychoneurotic or psycho-neurotic or adjustment or reactive) adj2 (health* or ill* or well* or disease* or disorder* or syndrome* or hygiene or symptom* or disturbance* or dysfunction* or attack* or trauma* or condition* or state* or status*)).tw,kf.                                                                                                                                                                                                                                                        |  |
| 5  | (anxiet* or depress* or stress* or distress* or PTSD or posttraumatic or post traumatic or nervous* or neuroses or neurosis or catastroph* or psychoneuroses or psycho-neuroses or phobi* or cyclothymi* or melanchol* or trauma* or obsess* or OCD or dysthymi* or dysphori* or astheni* or psychastheni* or alexithymi* or hysteri* or psychotrauma or burnout or burn-out or cothymi* or self-harm or suicid* or parasuicid* or self-injur* or self-mutilat* or self-destructive behavior*).tw,kf.                                                                                                                                            |  |
| 6  | 1 or 2 or 3 or 4 or 5                                                                                                                                                                                                                                                                                                                                                                                                                                                                                                                                                                                                                            |  |
| 7  | exp Coronaviridae Infections/                                                                                                                                                                                                                                                                                                                                                                                                                                                                                                                                                                                                                    |  |
| 8  | exp Coronavirus/                                                                                                                                                                                                                                                                                                                                                                                                                                                                                                                                                                                                                                 |  |
| 9  | (2019-ncov* or 2019ncov* or 2019n-cov* or coronaviru* or corona viru* or covid or covid-19 or covid19* or ncov* or novel cov* or ncov* or covid-2019 or covid2019 or SARS-COV-2* or SARS-COV2* or SARSCOV-2* or SARSCOV2* or SARSCOV19 or SARSCOV-19 or SARSCOV-19 or SARS-COV-2019 or SARSCOV2019 or SARSCOV-2019 or Wuhan pneumonia or Wuhan virus or severe acute respiratory syndrome or severe acute respiratory disease).tw,kf.                                                                                                                                                                                                            |  |
| 10 | 7 or 8 or 9                                                                                                                                                                                                                                                                                                                                                                                                                                                                                                                                                                                                                                      |  |
| 11 | 6 and 10                                                                                                                                                                                                                                                                                                                                                                                                                                                                                                                                                                                                                                         |  |
| 12 | limit 11 to "all child (0 to 18 years)"                                                                                                                                                                                                                                                                                                                                                                                                                                                                                                                                                                                                          |  |
| 13 | exp Child/ or exp infant/ or adolescent/ or exp pediatrics/ or child, abandoned/ or exp child, exceptional/ or child, orphaned/ or child, unwanted/ or minors/ or (pediatric* or paediatric* or child* or newborn* or congenital* or infan* or baby or babies or neonat* or pre- term or preterm* or premature birth* or NICU or preschool* or pre-school* or kindergarten* or kindergarden* or elementary school* or nursery school* or (day care* not adult*) or schoolchild* or toddler* or boy or boys or girl* or middle school* or pubescen* or juvenile* or teen* or youth* or high school* or adolesc* or pre-pubesc* or prepubesc*).mp. |  |

|    |                                                    |  |
|----|----------------------------------------------------|--|
|    | or (child* or adolesc* or pediat* or paediat*).jn. |  |
| 14 | 6 and 10 and 13                                    |  |
| 15 | 12 or 14                                           |  |
| 16 | limit 15 to dt=20200101-20210228                   |  |

Note. \*Indicates that words were truncated in order to instruct the database to capture all variant endings and spellings of the search terms.

**eTable 2.** Study Quality Evaluation Criteria.<sup>1</sup>

|                                     |                                                                                                                           |
|-------------------------------------|---------------------------------------------------------------------------------------------------------------------------|
| <b>Quality 1:Valid Measure</b>      | Are the depression/anxiety measures validated questionnaires?<br>0-no<br>1-yes                                            |
| <b>Quality 2:Peer reviewed</b>      | Was the study peer reviewed?<br>0-no<br>1-yes                                                                             |
| <b>Quality 3:50% participation</b>  | Did at least 50% of the eligible population participate?<br>0-no<br>1-yes                                                 |
| <b>Quality 4: Objective outcome</b> | Were the measures of mental health objective (e.g. a diagnosis) as opposed to self-report<br>0-self-report<br>1-objective |
| <b>Quality 5: Exposure time</b>     | Did enough time elapse since COVID for there to be an impact on mental health?<br>0-no<br>1-yes                           |

---

<sup>1</sup> Adapted from the NIH Quality Assessment Tool for Observational Cohort and Cross-Sectional Studies to evaluate any bias in the study or measurements. This measure is available at <https://www.nhlbi.nih.gov/health-topics/study-quality-assessment-tools>

**eTable 3.** Quality Assessment of Studies Included.

| First Author, Year   | Valid Measure | Peer Reviewed | 50% Participation | Objective Outcome | Exposure Time | Total Score (0-5) |
|----------------------|---------------|---------------|-------------------|-------------------|---------------|-------------------|
| AlAzzam 2021         | 1             | 1             | 0                 | 0                 | 0             | 2                 |
| Asanov 2021          | 1             | 1             | 0                 | 0                 | 1             | 3                 |
| Cao 2021             | 1             | 1             | 0                 | 0                 | 1             | 3                 |
| Cheah 2020           | 1             | 1             | 0                 | 0                 | 1             | 3                 |
| Chen 2020a           | 1             | 1             | 0                 | 0                 | 1             | 3                 |
| Chen 2020b           | 1             | 1             | 0                 | 0                 | 1             | 3                 |
| Chi 2020             | 1             | 1             | 0                 | 0                 | 1             | 3                 |
| Crescentini 2020     | 1             | 1             | 0                 | 0                 | 1             | 3                 |
| Dong 2020            | 1             | 1             | 0                 | 0                 | 1             | 3                 |
| Duan 2020            | 1             | 1             | 0                 | 0                 | 1             | 3                 |
| Garcia de Avila 2020 | 1             | 1             | 0                 | 0                 | 1             | 3                 |
| Giannopoulou 2021    | 1             | 1             | 0                 | 0                 | 1             | 3                 |
| Glynn 2021           | 1             | 1             | 1                 | 0                 | 1             | 4                 |
| Hou 2020             | 1             | 1             | 0                 | 0                 | 0             | 2                 |
| Li 2021              | 1             | 1             | 0                 | 0                 | 1             | 3                 |
| Luthar 2020          | 1             | 1             | 1                 | 0                 | 0             | 3                 |
| McGuine 2020         | 1             | 1             | 0                 | 0                 | 1             | 3                 |
| MacTavish 2021       | 1             | 1             | 1                 | 0                 | 1             | 4                 |
| Murata 2020          | 1             | 1             | 0                 | 0                 | 1             | 3                 |
| Orgiles 2021         | 1             | 1             | 0                 | 0                 | 1             | 3                 |
| Ravens-Sieberer 2021 | 1             | 1             | 0                 | 0                 | 1             | 3                 |
| Tang 2021            | 1             | 1             | 1                 | 0                 | 1             | 4                 |
| Xie 2020             | 1             | 1             | 0                 | 0                 | 1             | 3                 |
| Yue 2020             | 1             | 1             | 1                 | 0                 | 1             | 4                 |
| Zhang 2020a          | 1             | 1             | 0                 | 0                 | 1             | 3                 |
| Zhang 2020b          | 1             | 1             | 1                 | 0                 | 1             | 4                 |
| Zhang 2020c          | 1             | 1             | 0                 | 0                 | 1             | 3                 |

|            |   |   |   |   |   |   |
|------------|---|---|---|---|---|---|
| Zhou 2020a | 1 | 1 | 0 | 0 | 1 | 3 |
| Zhou 2020b | 1 | 1 | 0 | 0 | 1 | 3 |

**eTable 4.** Sensitivity analysis excluding low quality studies (score=2) for moderators of the prevalence of clinically elevated depressive symptoms in children and adolescence during COVID-19.

| <b>Categorical Moderators</b>    | <b>k</b> | <b>Prevalence</b>   | <b>95% CI</b> | <b>Homogeneity<br/>Q</b> | <b>p</b> |
|----------------------------------|----------|---------------------|---------------|--------------------------|----------|
| Symptom reporter                 |          |                     |               | .208                     | .648     |
| Self-report                      | 21       | .236 <sup>***</sup> | .194, .285    |                          |          |
| Parent report                    | 3        | .268 <sup>**</sup>  | .157, .417    |                          |          |
| Geographical Region              |          |                     |               | 3.076                    | .22      |
| East Asia                        | 15       | .216 <sup>***</sup> | .167, .274    |                          |          |
| North America                    | 5        | .284 <sup>**</sup>  | .185, .408    |                          |          |
| Europe                           | 3        | .338                | .200, .510    |                          |          |
| <b>Continuous Moderators</b>     | <b>k</b> | <b>Estimate</b>     | <b>95% CI</b> | <b>Z</b>                 | <b>p</b> |
| Participant Age                  | 24       | .06                 | -.02, .13     | 1.47                     | .140     |
| Participant Sex                  | 24       | .03                 | .01, .05      | 2.99                     | .003     |
| Month of data collection in 2020 | 23       | .26                 | .06, .46      | 2.54                     | .01      |

Note. k=number of studies; CI = confidence interval. \* $p<.05$ ; \*\* $p<.01$ ; \*\*\* $p<.001$

**eTable 5.** Sensitivity analysis excluding low quality studies (score=2) for moderators of the prevalence of clinically elevated anxiety symptoms in children and adolescence during COVID-19.

| <b>Categorical Moderators<sup>a</sup></b> | <b>k</b> | <b>Prevalence</b> | <b>95% CI</b> | <b>Homogeneity Q</b> | <b>p</b> |
|-------------------------------------------|----------|-------------------|---------------|----------------------|----------|
| Geographical Region                       |          |                   |               | 10.771               | .01      |
| East Asia                                 | 13       | .159***           | .124, .201    |                      |          |
| North America                             | 5        | .207***           | .139, .296    |                      |          |
| Europe                                    | 4        | .339*             | .233, .464    |                      |          |
| <b>Continuous Moderators</b>              | <b>k</b> | <b>Estimate</b>   | <b>95% CI</b> | <b>Z</b>             | <b>p</b> |
| Participant Age                           | 23       | .04               | -.05, .13     | .87                  | .38      |
| Participant Sex                           | 23       | .04               | .01, .07      | 2.94                 | .003     |
| Month of data collection in 2020          | 22       | .27               | .10, .44      | 3.10                 | .002     |

Note. k=number of studies; CI = confidence interval. \* $p<.05$ ; \*\* $p<.01$ ; \*\*\* $p<.001$

<sup>a</sup> Symptom reporter (self-report versus parent-report) could not be examined as there were insufficient studies at each level of the categorical comparison (i.e., two studies had parent report).

**eFigure 1.** PRISMA diagram of review search strategy.

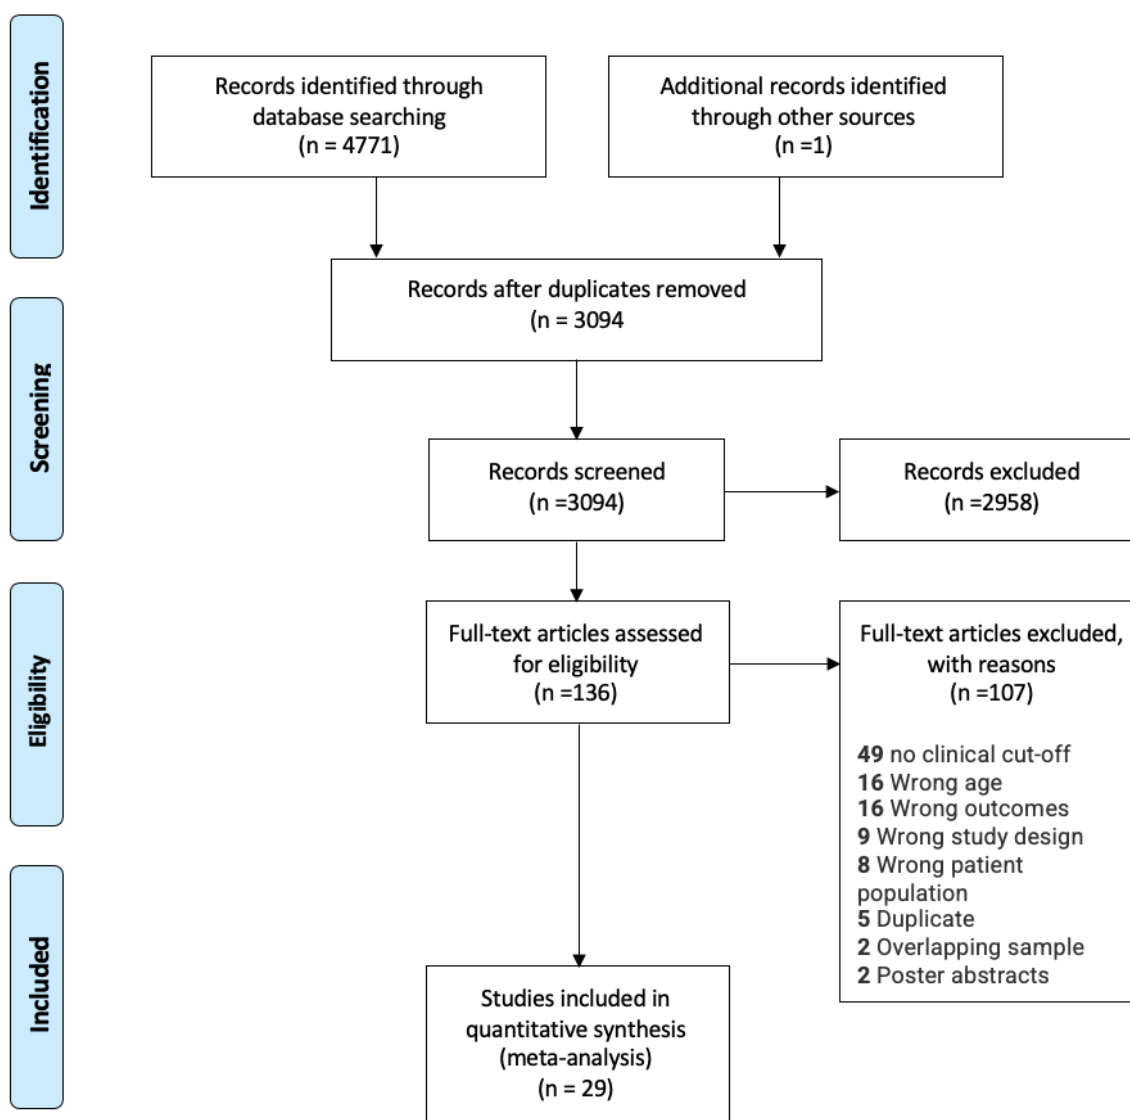

**eFigure 2.** Funnel plot for studies included in the clinically elevated depressive symptoms.

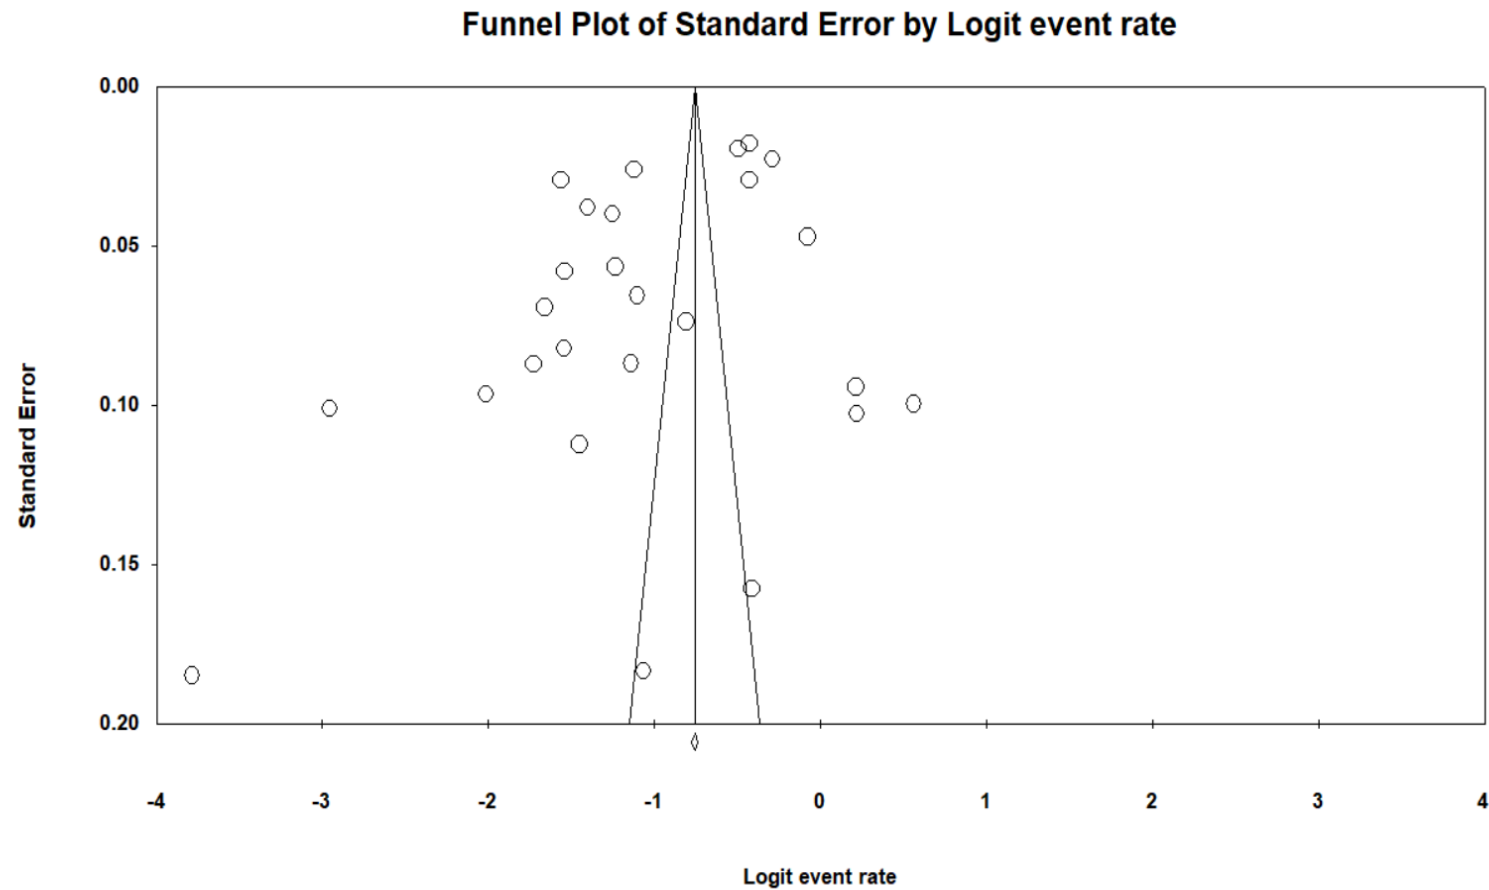

Note. The x-axis represents the effect size (random effects) and the y-axis represents the standard error. The white circles indicate studies included in the meta-analysis. The white diamond represents the observed mean effect size.

**eFigure 3.** Funnel plot for studies included in the clinically elevated anxiety symptoms.

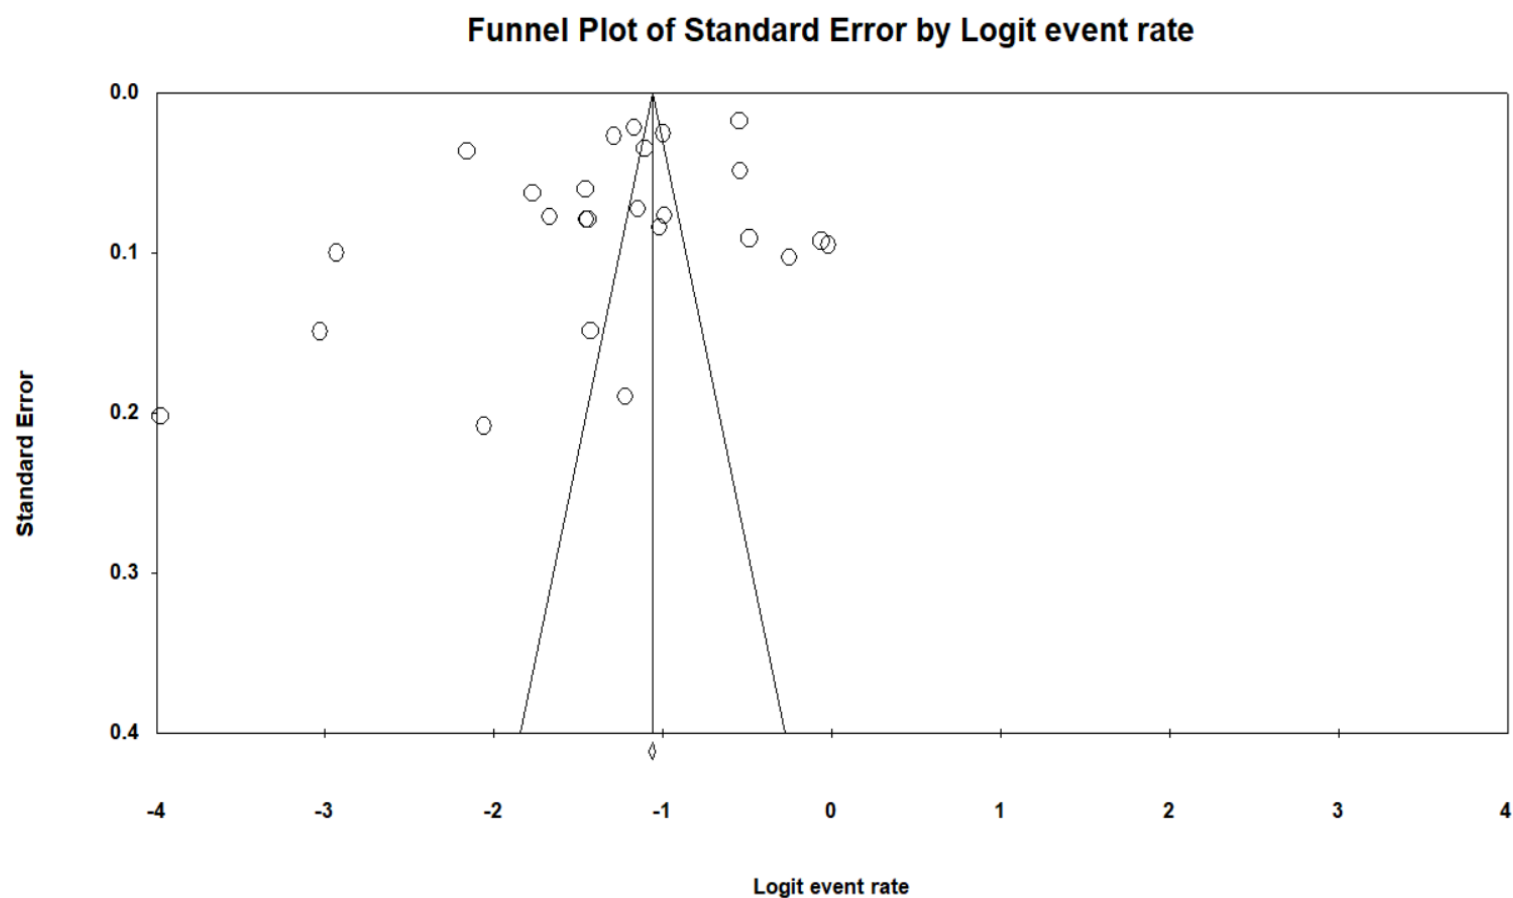

Note. The x-axis represents the effect size (random effects) and the y-axis represents the standard error. The white circles indicate studies included in the meta-analysis. The white diamond represents the observed mean effect size.
